# Supplementary material for: Two New Cyototoxic Cardenolides from the Whole Plants of Adonis multiflora Nishikawa & Koki Ito
Source: Molecules. 2015 Nov 23;20(11):20823–31. doi: 10.3390/molecules201119722 (PMC6332151; doi:10.3390/molecules201119722)

## Supporting Information

In this ‘Supporting Information’ file for the manuscript “**Two new cytotoxic cardenolides from the whole plants of *Adonis multiflora* Nishikawa & Koki Ito**”,  $^1\text{H}$ -NMR, and  $^{13}\text{C}$ -NMR spectra of two new compound **1** and **6** are available here as listed below.

### Contents:

Page 2-4  $^1\text{H}$  and  $^{13}\text{C}$  NMR of **1**

Page 5-7  $^1\text{H}$ ,  $^{13}\text{C}$  NMR and HMBC of **6**

# <sup>1</sup>H NMR of compound 1.

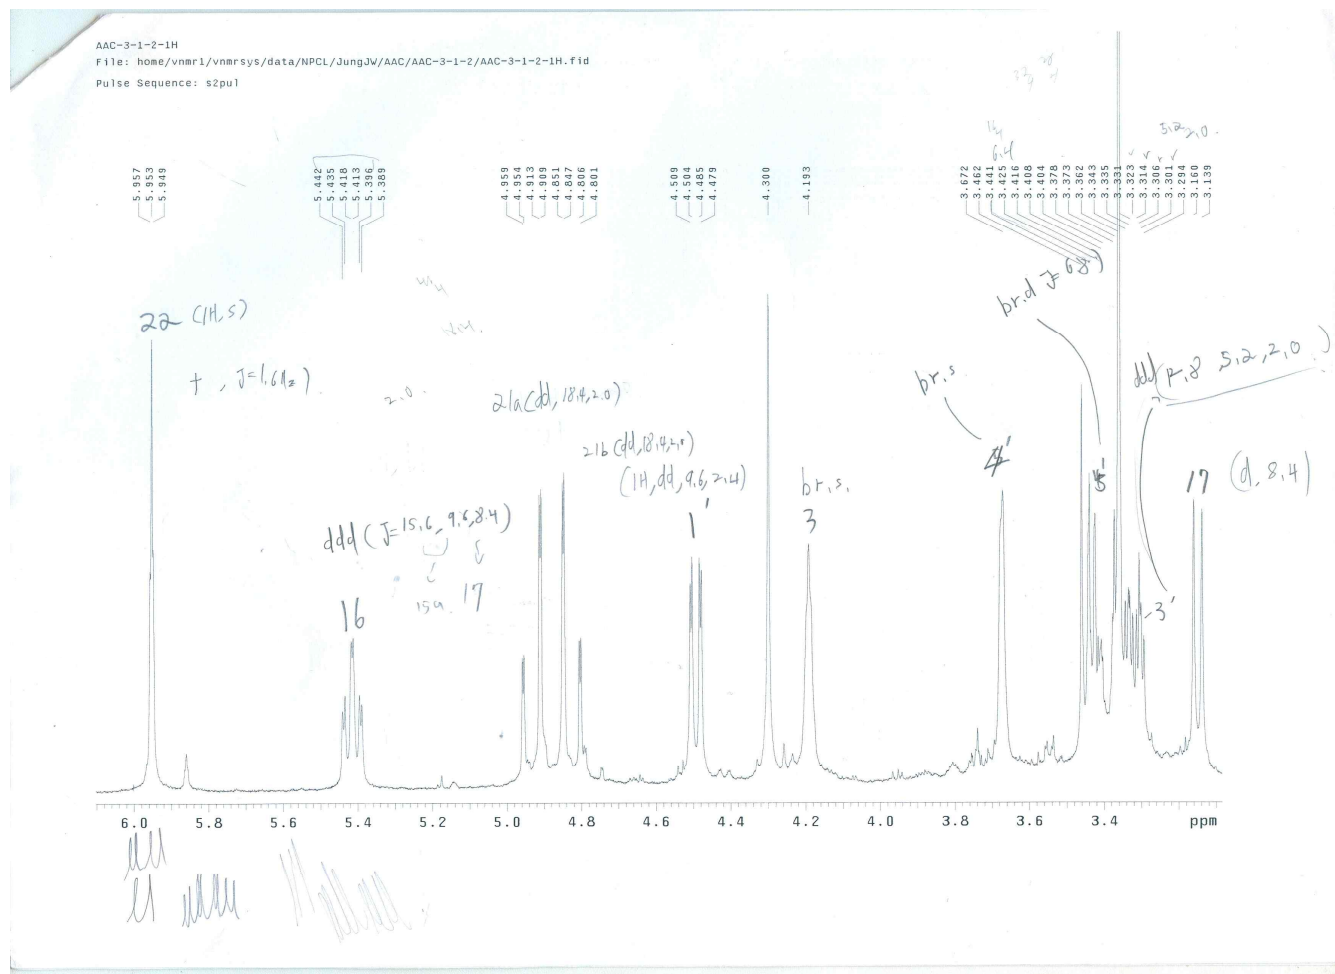

$^1\text{H}$  NMR of compound 1.

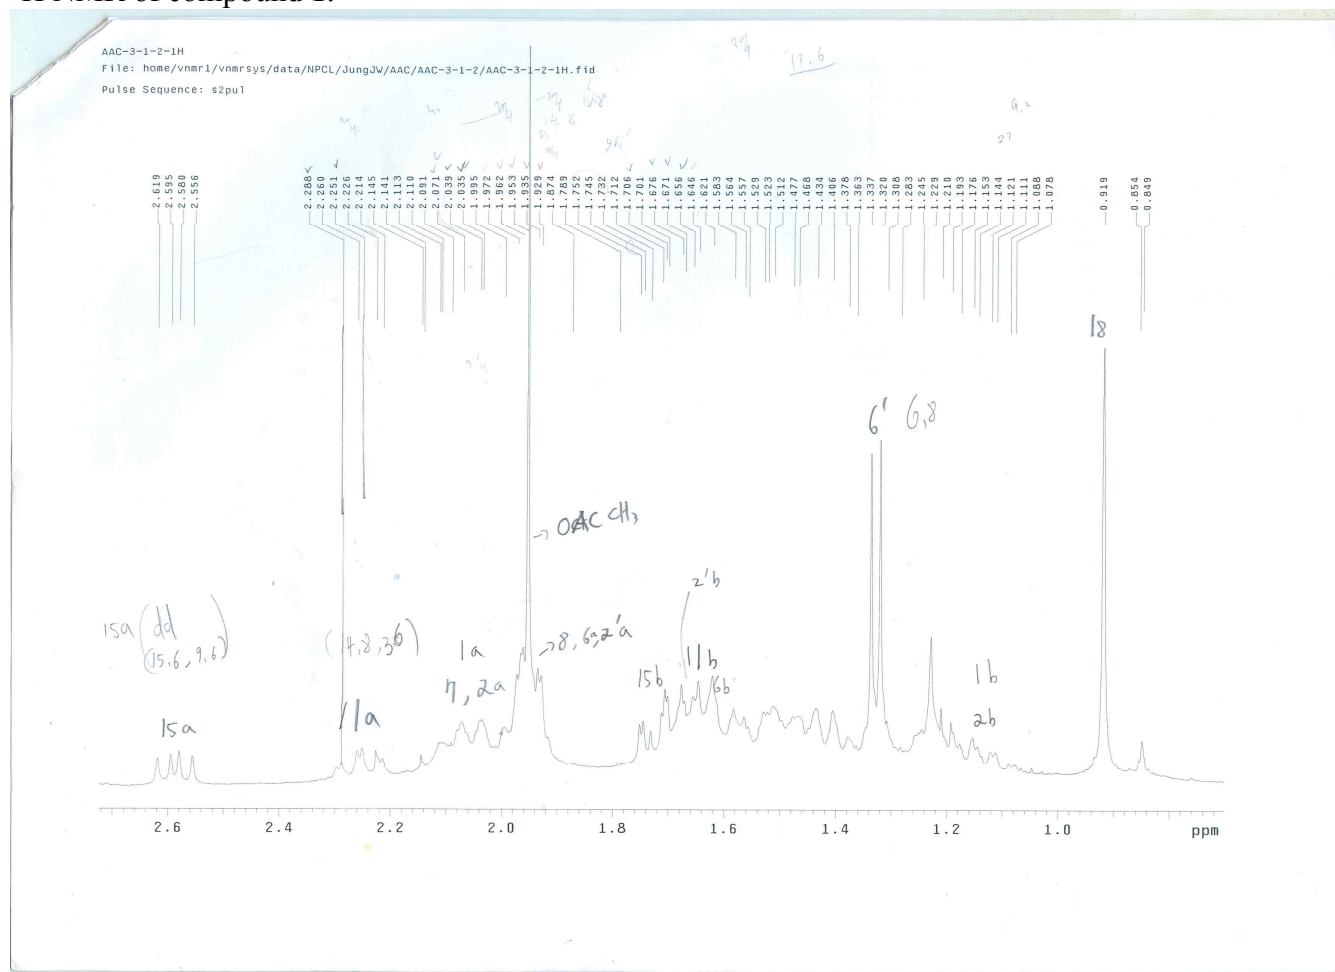

$^{13}\text{C}$  NMR of compound 1.

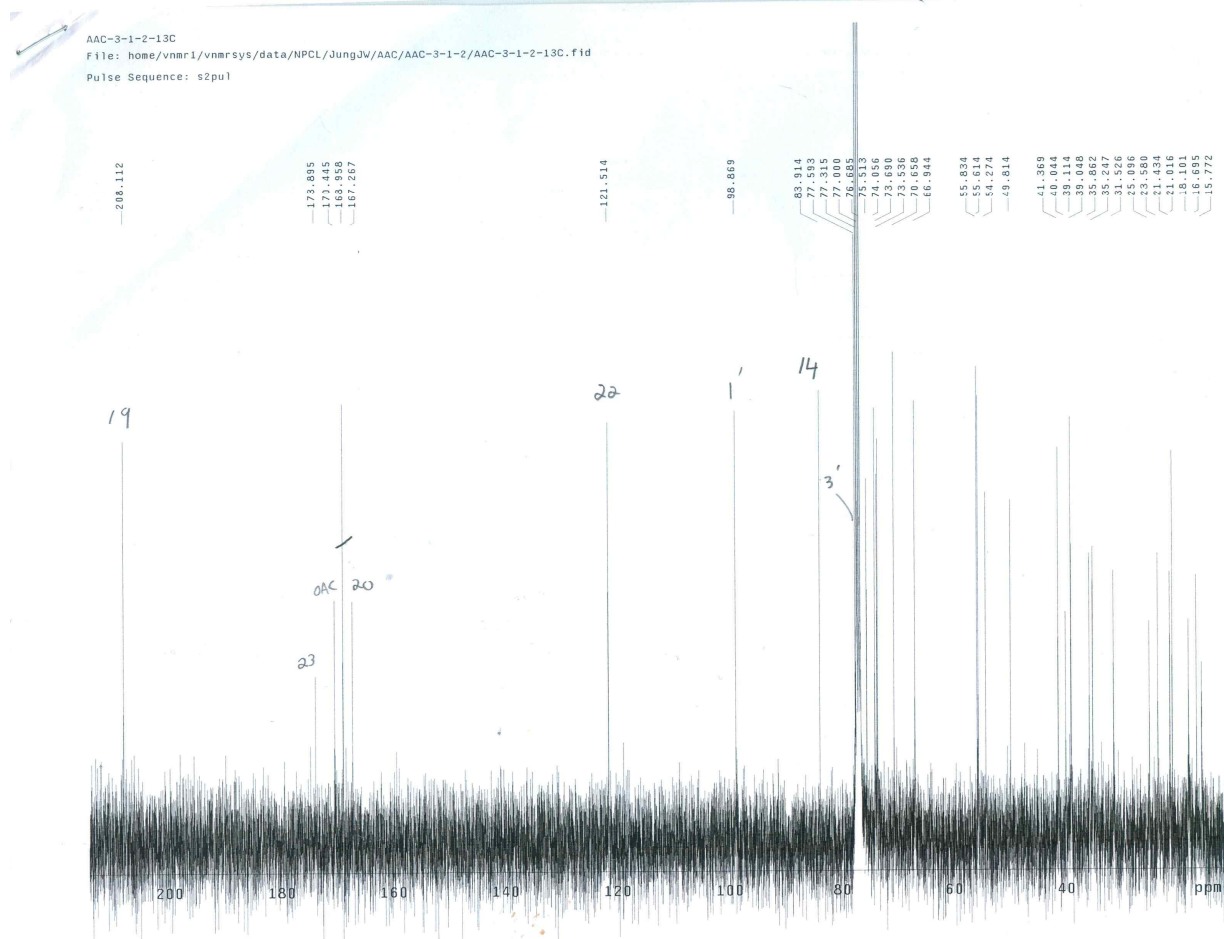

$^1\text{H}$  NMR of compound 6.

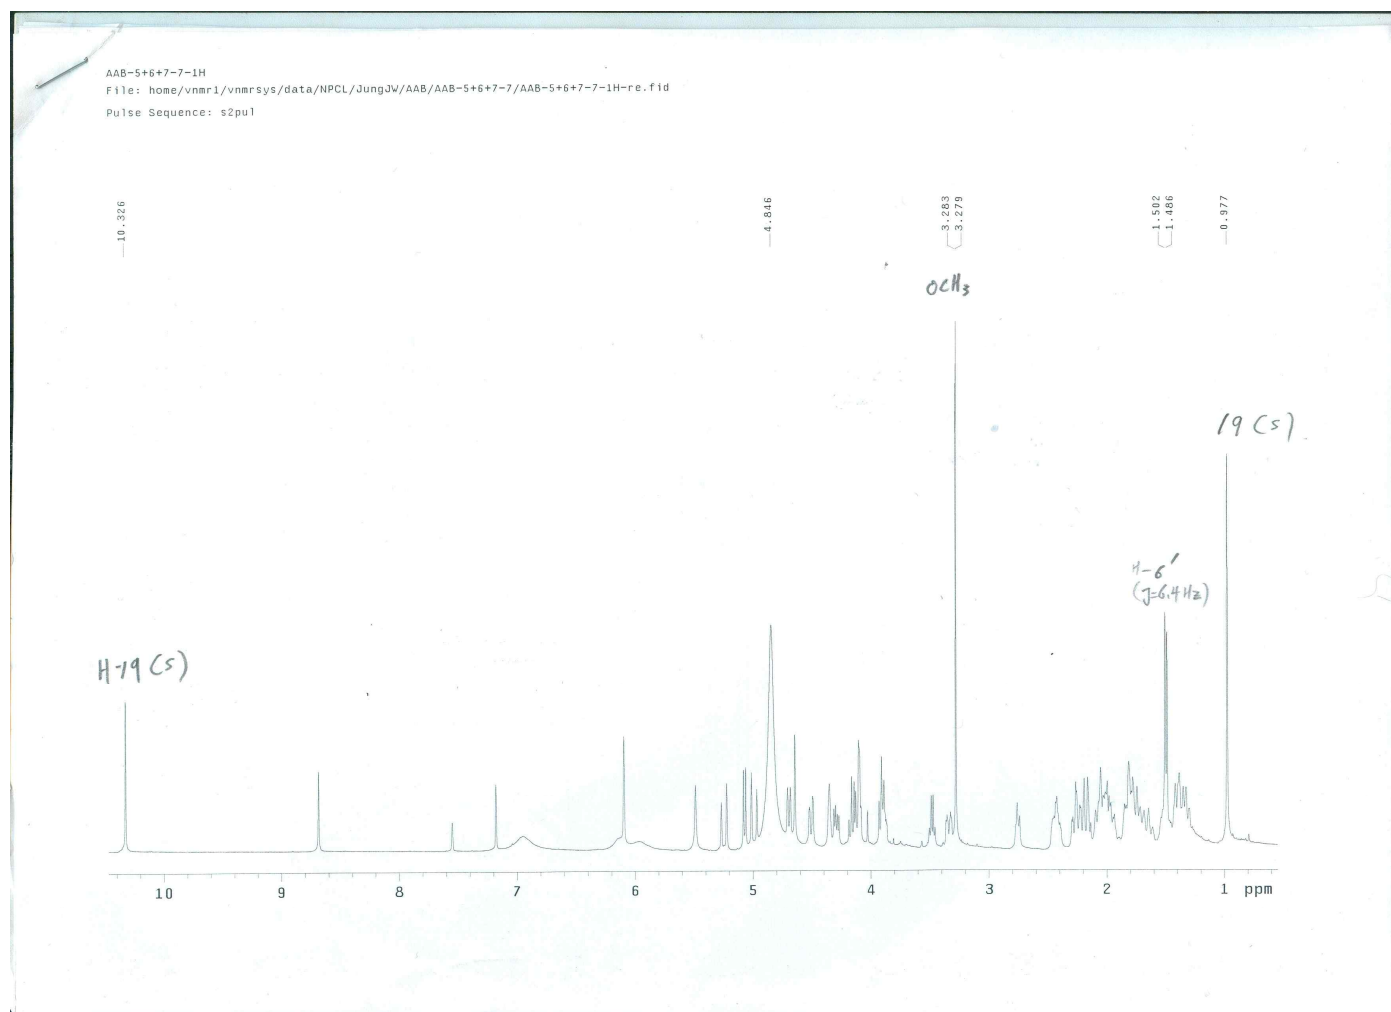

$^{13}\text{C}$  NMR of compound **6**.

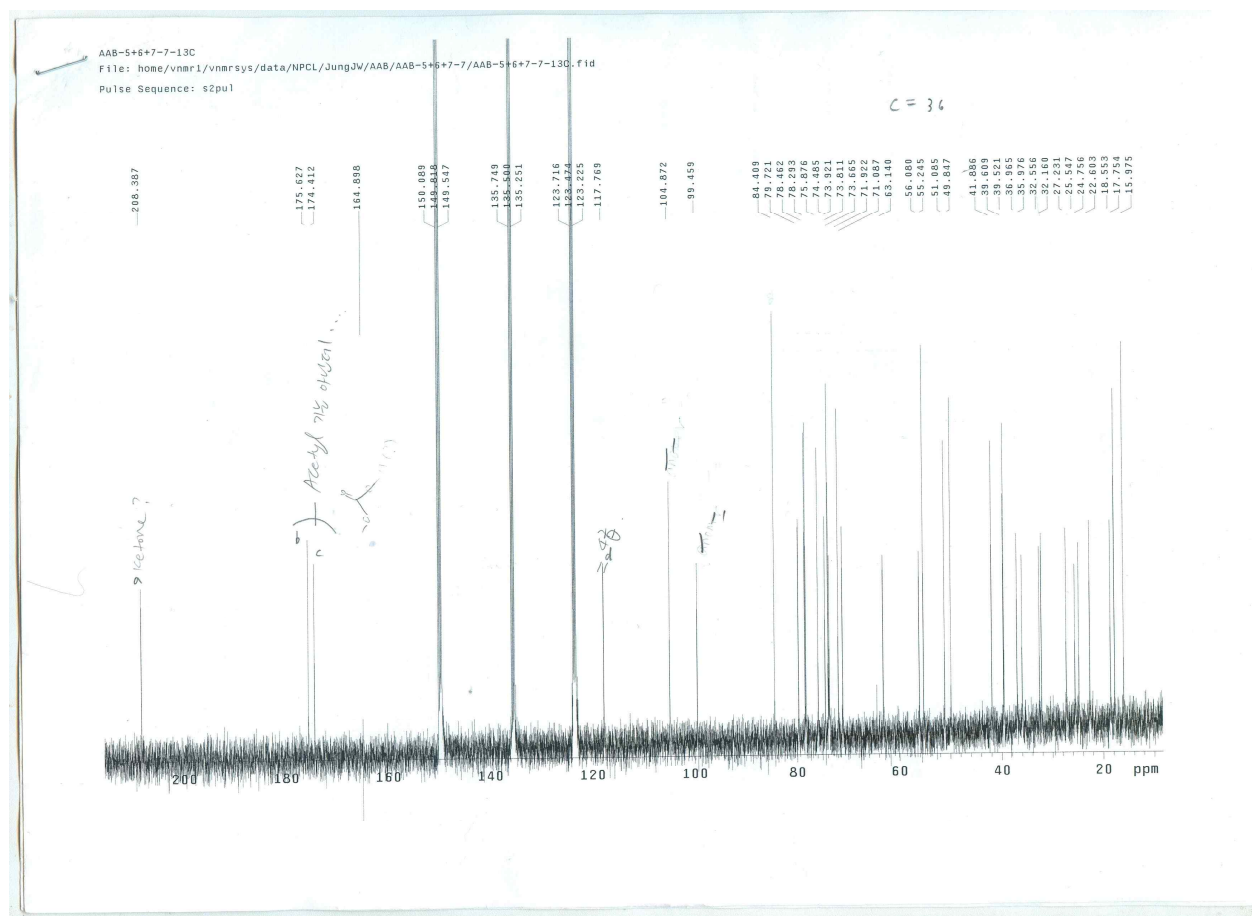

# HMBC of compound 6.

AAB-5+6+7-7-gHMBC  
 File: home/vnmr1/vnmrsys/data/NPCL/JungJW/AAB/AAB-5+6+7-7/AAB-5+6+7-7-gHMBC.fid  
 Pulse Sequence: gHMBC  
 Solvent: pyridine  
 Temp. 35.0 C / 308.1 K  
 Operator: vnmr1  
 File: AAB-5+6+7-7-gHMBC  
 INOVA-400 "Agilent-NMR"

Relax. delay 1.000 sec  
 Mixing 0.080 sec  
 Acq. time 0.128 sec  
 Width 6402.6 Hz  
 2D Width 24147.3 Hz  
 24 repetitions  
 200 increments  
 OBSERVE H1, 400.1532245 MHz  
 DATA PROCESSING  
 Sine bell 0.064 sec  
 F1 DATA PROCESSING  
 Sine bell 0.008 sec  
 FT size 4096 x 16384  
 Total time 1 hr, 30 min, 6 sec

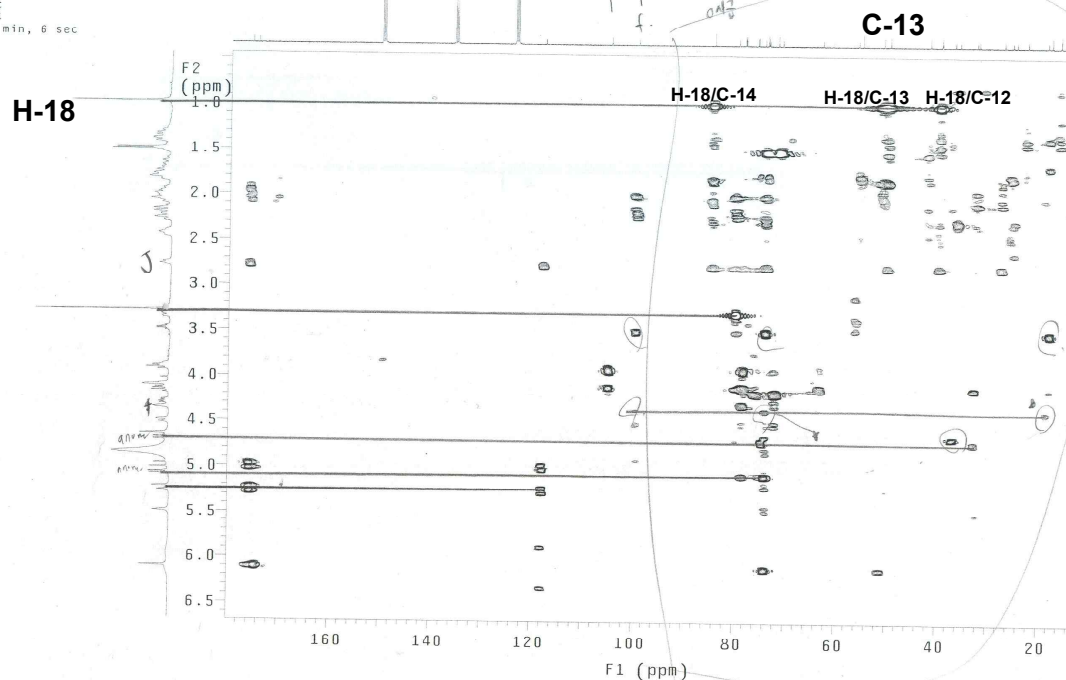

Supplement: Supplementary file 1 [file molecules-20-19722-s001.pdf]
